# Supplementary material for: The Health Policy Attitudes of American Medical Students: A Pilot Survey
Source: PubMed Central journal article supplement (PMC4608797; doi:10.1371/journal.pone.0140656), 2015-10-16
Supplement: pone.0140656.s002.pdf [file pone.0140656.s002.pdf]

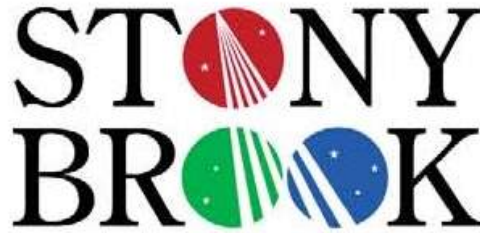

STATE UNIVERSITY OF NEW YORK  
COMMITTEES ON RESEARCH INVOLVING HUMAN SUBJECTS  
Established 1971

Exit this survey

**\* What is your age in years?**

- Less than 21 years of age
- Between 21 and 24 years of age
- Between 25 and 29 years of age
- Between 30 and 34 years of age
- 35 years of age or greater

**\* What is your gender?**

- Male
- Female

**\* What is your self described race or ethnic group? Please check all that apply.**

- White
- Asian (also includes South Asian)
- Black
- American Indian or Alaska Native
- Hispanic/Latino
- Other

**\* What level of medical school are you currently in?**

- 1st year medical student
- 2nd year medical student
- 3rd year medical student
- 4th year medical student
- I never was nor am I currently a medical student
- I graduated from medical school
- Other

Other (please specify)

**\* In which aspect of medicine are you most considering a career?**

- Primary Care
- Surgery
- Procedural Specialty
- Nonprocedural specialty
- Nonclinical specialty
- Other
- Undecided

**\* Were you or a loved one significantly affected by the recent economic downturn?**

Yes

No

**\* What is your anticipated educational debt upon graduation?**

No educational debt

Less than \$50,000

\$50,000 - \$100,000

\$100,000 - \$150,000

\$150,000 - \$200,000

\$200,000 - \$250,000

\$250,000 - \$300,000

Greater than \$300,000

**\* Which category of medical school do you currently attend?**

Public

Private

**\* Please select the U.S. region in which your medical school resides.**

South

Midwest

Northeast

West

Outside the 50 states of the U.S.A.

**\* Do you intend to practice medicine in the USA?**

Yes

No

Undecided

**\* Which form of employment are you most considering as a future physician?**

Self Employment / Private Practice

Hospital Employment

Other

Undecided

**\* What is your political self-characterization?**

Moderate

Liberal

Conservative

Other

**\* Addressing societal health policy issues, as important as that may be, falls outside the scope of my future professional obligations as a physician.**

Strongly Disagree

Moderately Disagree

Moderately Agree

Strongly Agree

**\* Every physician is professionally obligated to care for the uninsured and the underinsured.**

Strongly Disagree

Moderately Disagree

Moderately Agree

Strongly Agree

**\* I would favor limiting reimbursement for expensive drugs and procedures if that would help expand access to basic health care for those currently lacking such care.**

Strongly Disagree

Moderately Disagree

Moderately Agree

Strongly Agree

**\* I would favor limiting reimbursement and the ability to repay student loans if that would help expand access to basic health care for those currently lacking such care.**

Strongly Disagree

Moderately Disagree

Moderately Agree

Strongly Agree

**\* Indicate the degree to which you object (if at all), for moral reasons to the following practice- Using cost-effectiveness data to determine which treatments will be offered to patients.**

No Moral Objection

Moderate Moral Objection

Strong Moral Objection

**\* Of the following entities, which do you feel is the most responsible for advocating for your professional interests?**

Professional Organizations (Ex: American Medical Association, American Association of Medical Colleges)

Student organizations (Ex: American Medical Student Association, AMA Medical Student Section)

Medical Schools

Students

Myself

**Optional - Please write in and or select a total of 5 issues related to US health policy you feel are most important.**

- |                                                                                                    |                                                                                           |                                                                           |
|----------------------------------------------------------------------------------------------------|-------------------------------------------------------------------------------------------|---------------------------------------------------------------------------|
| Overuse of tests and procedures that are unwarranted and or have limited evidence of effectiveness | Medical student indebtedness / The rising cost of medical school tuition                  | Increasing bureaucracy / Increasing administrative costs                  |
| Culture of luxuries before necessities                                                             | Limited use of preventative medicine / Limited investment in public health                | Limited patient health education / health literacy                        |
| Emergency room misuse                                                                              | Increasing number of uninsured and underinsured                                           | Media mischaracterization                                                 |
| Limited prescription of generic drugs                                                              | Increase in the number of medical students without comparable increase in residency slots | Mandatory acceptance of Medicare/Medicaid as a possible term of licensure |
| Increasing scope of practice of mid-level health care providers (NP, PA, midwife etc.)             | Doctor shortage                                                                           | Healthcare disparities                                                    |
| Increasing consumer/patient expectations                                                           | Limited medical malpractice reform                                                        |                                                                           |
| For-profit insurance / managed health care                                                         | Limited Medicaid and Medicare reimbursement                                               |                                                                           |
| Other (When writing please separate issues with "/". You may write up to 250 characters.)          |                                                                                           |                                                                           |

**Optional - Please enter the valid MEDICAL SCHOOL email address at which you wish to receive your \$100 gift certificate should you be a winner. Again, this is optional and is strictly to provide a means of incentive disbursement. Your response to this question will be destroyed at the completion of the study and**

will remain confidential until that point. You will not be contacted by an investigator unless you are a \$100 visa gift certificate winner.

Optional - please feel free to submit comments (up to 1000 characters in length). Thank you for taking part in this survey.

Prev

Done

Powered by **SurveyMonkey**  
Check out our [sample surveys](#) and create your own now!
