# Supplementary material for: The Health Policy Attitudes of American Medical Students: A Pilot Survey
Source: PLoS One. 2015 Oct 16;10(10):e0140656. doi: 10.1371/journal.pone.0140656 (PMC4608797; doi:10.1371/journal.pone.0140656)
Supplement: S3 File — (XLSX) [file pone.0140656.s003.xlsx]

## Sheet: Sheet1
		Conservative vs Other				Liberal vs Other				Moderate vs Other
	Descriptive Statistics	Conservative	Other	χ2 p		Liberal	Other	χ2 p		Moderate	Other	χ2 p
	Demographics
	Study Period			0.2149				0.9507				0.9674
	1st Half	78.05	21.95			89.56	10.44			88.64	11.36
	2nd Half	82.32	17.68			89.68	10.32			88.55	11.45
	Age			0.1504				0.3341				0.0116
	<25	84	16			90.91	9.09			91.73	8.27
	>24	79.02	20.98			88.98	11.02			86.44	13.56
	Gender			0.0028				<.0001				<.0001
	Male	77.21	22.79			81.03	18.97			83.87	16.13
	Female	87.63	12.37			96.02	3.98			94.39	5.61
	Race			0.0003				<.0001				0.0001
	White	83.06	16.94			88.9	11.1			88.17	11.83
	Asian	75	25			95.21	4.79			94.24	5.76
	Black	100	0			100	0			100	0
	Hispanic/Latino	100	0			100	0			100	0
	Multiple/Other	55.81	44.19			77.65	22.35			75.64	24.36
	Political Orientation
	Moderate	x	x			x	x			x	x
	Liberal	x	x			x	x			x	x
	Conservative	x	x			x	x			x	x
	Other	x	x			x	x			x	x
		Conservative vs Other				Liberal vs Other				Moderate vs Other
	Descriptive Statistics	Conservative	Other	χ2 p		Liberal	Other	χ2 p		Moderate	Other	χ2 p
	Economic
	Recessionn Hit			0.032				0.007				0.0069
	Yes	77.32	22.68			87.01	12.99			85.71	14.29
	No	84.42	15.58			92.08	7.92			91.28	8.72
	Debt			0.0093				0.0154				0.002
	No educational debt	82.69	17.31			89.66	10.34			90.32	9.68
	Less than $$100,000	73.97	26.03			89.14	10.86			86.52	13.48
	$100,000 - $200,000	78.07	21.93			87.72	12.28			87.03	12.97
	$200,000 - $300,000	87.8	12.2			93.3	6.7			92.69	7.31
	Greater than $300,000	70	30			81.71	18.29			76.19	32.81
	Medical Characteristics
	Level			0.097				0.5514				0.2161
	1st year	75.86	24.14			88.33	11.67			86.41	13.59
	2nd year	81.22	18.78			89.82	10.18			88.28	11.72
	3rd year	80.77	19.23			89.25	10.75			88.76	11.24
	4th year	87.96	12.04			92.4	7.6			92.7	7.3
	Clinical Level			0.0876				0.3899				0.1082
	Preclinical	78.59	21.41			89.05	10.95			87.31	12.69
	Clinical	84.43	15.57			90.76	9.24			90.73	9.27
	School Category			0.0892				0.2267				0.3777
	Public	77.55	22.45			88.37	11.63			87.61	12.39
	Private	83.23	16.77			90.66	9.34			89.43	10.57
	School Region			0.0113				0.008				0.0915
	South	83.33	16.67			81.82	18.18			86.21	13.79
	Midwest	85.78	14.22			88.77	11.23			89.4	10.6
	Northeast	77.23	22.77			93.11	6.89			91.76	8.24
	West	71.9	28.1			89.44	10.56			85.15	14.85
		Conservative vs Other				Liberal vs Other				Moderate vs Other
	Descriptive Statistics	Conservative	Other	χ2 p		Liberal	Other	χ2 p		Moderate	Other	χ2 p
	Medical Prefrences
	Practice in US?			0.0062				0.2138				0.0231
	Yes	81.72	18.28			90	10			89.13	10.87
	No	75	25			80	20			80	20
	Undecided	50	50			82.61	17.39			73.33	26.67
	Employment Type			0.3296				0.3185				0.9633
	Private Practice	85.62	14.38			85.71	14.29			89.22	10.78
	Hospital Employment	78.17	21.83			90.64	9.36			88.34	11.66
	Other	78.57	21.43			91.78	8.22			86.67	13.33
	Undecided	80.25	19.75			89.31	10.69			88.81	11.19
	Private Practice			0.0751				0.0846				0.7499
	Other	78.99	21.01			90.3	9.7			88.42	11.58
	Private Practice	85.62	14.38			85.71	14.29			89.22	10.78
	Specialty			0.0184				0.1189				0.3401
	Primary Care	83.16	16.84			91.96	8.04			889.3	10.7
	Surgery	83.33	16.67			84.47	15.53			89.19	10.81
	Procedural Specialty	82.35	17.65			88.2	11.8			88.65	11.35
	Nonprocedural specialty	81.08	18.92			91.41	8.59			90.07	9.93
	Nonclinical specialty	90	10			91.67	8.33			88.89	11.11
	Other	91.67	8.33			96.3	3.7			96.77	3.23
	Undecided	63.64	36.36			85.88	14.12			83.1	16.9
	Primary Care			0.3069				0.053				0.6407
	Other	79.58	20.42			88.21	11.79			88.26	11.74
	Primary Care	83.16	16.84			91.96	8.04			89.3	10.7
		Conservative vs Other				Liberal vs Other				Moderate vs Other
	Descriptive Statistics	Conservative	Other	χ2 p		Liberal	Other	χ2 p		Moderate	Other	χ2 p
	Outcomes
	Policy Not Doc Scope			0.7887				0.0024				0.0007
	Strongly Disagree	81.07	18.93			92.56	7.44			89.71	10.29
	Moderately Disagree	81.09	18.91			85.39	14.61			88.66	11.34
	Moderately Agree	81.67	18.33			87.06	12.94			88.42	11.58
	Strongly Agree	73.08	26.92			82.5	17.5			56.25	43.75
	Obligation to Care			0.0035				<.0001				<.0001
	Strongly Disagree	72.03	27.97			57.69	42.31			66.67	33.33
	Moderately Disagree	85.53	14.47			81.6	18.4			86.86	13.14
	Moderately Agree	85.35	14.65			92.27	7.73			93.24	6.76
	Strongly Agree	73.91	26.09			94.93	5.07			90.48	9.52
	Favor Cuts			0.0005				<.0001				<.0001
	Strongly Disagree	80.65	19.35			58.14	41.86			75.17	24.83
	Moderately Disagree	85.57	14.43			84.18	15.82			88.89	11.11
	Moderately Agree	80.79	19.21			94.54	5.46			93.32	6.68
	Strongly Agree	55.56	44.44			93.77	6.23			87.1	12.9
	Alternate Favor Cuts			0.0424				<.0001				0.0216
	Strongly Disagree	82.37	17.63			78.85	21.15			85.22	14.78
	Moderately Disagree	83.54	16.46			92.97	7.03			91.77	8.23
	Moderately Agree	71.83	28.17			93.51	6.49			90.65	9.35
	Strongly Agree	65	35			92.93	7.07			82.93	17.07
	Cost Effectiveness Objection			0.2268				<.0001				0.0002
	No Moral Objection	76.51	23.49			90.37	9.63			88.98	11.02
	Moderate Moral Objection	83.27	16.73			91.96	8.04			91.24	8.76
	Strong Moral Objection	81.41	18.59			78.68	21.32			78.2	21.8
	Advocacy Entity			0.4577				0.0003				0.0007
	Professional Organizations	83.57	16.43			91.43	8.57			91.64	8.36
	Student organizations	83.33	16.67			95.56	4.44			90.91	9.09
	Medical Schools	75	25			89.06	10.94			89.06	10.94
	Students	76.92	23.08			92.68	7.32			88.89	11.11
	Myself	77.62	22.38			82.85	17.15			81.05	18.95
				10 variables statistically significant				11 variables statistically significant				12 variables statistically significant
				11 variables insignificant				8 variables insignificant				9 variables insignificant

## Sheet: Sheet2
		Conservative vs Other				Liberal vs Other				Moderate vs Other
	Descriptive Statistics	Conservative	Other	χ2 p		Liberal	Other	χ2 p		Moderate	Other	χ2 p
	Demographics
	Study Period			0.2149				0.9507				0.9674
	1st Half	78.05	21.95			89.56	10.44			88.64	11.36
	2nd Half	82.32	17.68			89.68	10.32			88.55	11.45
	Age			0.1504				0.3341				0.0116
	<25	84	16			90.91	9.09			91.73	8.27
	>24	79.02	20.98			88.98	11.02			86.44	13.56
	Gender			0.0028				<.0001				<.0001
	Male	77.21	22.79			81.03	18.97			83.87	16.13
	Female	87.63	12.37			96.02	3.98			94.39	5.61
	Race			0.0003				<.0001				0.0001
	White	83.06	16.94			88.9	11.1			88.17	11.83
	Asian	75	25			95.21	4.79			94.24	5.76
	Black	100	0			100	0			100	0
	Hispanic/Latino	100	0			100	0			100	0
	Multiple/Other	55.81	44.19			77.65	22.35			75.64	24.36
	Political Orientation
	Moderate	x	x			x	x			x	x
	Liberal	x	x			x	x			x	x
	Conservative	x	x			x	x			x	x
	Other	x	x			x	x			x	x
		Conservative vs Other				Liberal vs Other				Moderate vs Other
	Descriptive Statistics	Conservative	Other	χ2 p		Liberal	Other	χ2 p		Moderate	Other	χ2 p
	Economic
	Recessionn Hit			0.032				0.007				0.0069
	Yes	77.32	22.68			87.01	12.99			85.71	14.29
	No	84.42	15.58			92.08	7.92			91.28	8.72
	Debt			0.0093				0.0154				0.002
	No educational debt	82.69	17.31			89.66	10.34			90.32	9.68
	Less than $$100,000	73.97	26.03			89.14	10.86			86.52	13.48
	$100,000 - $200,000	78.07	21.93			87.72	12.28			87.03	12.97
	$200,000 - $300,000	87.8	12.2			93.3	6.7			92.69	7.31
	Greater than $300,000	70	30			81.71	18.29			76.19	32.81
	Medical Characteristics
	Level			0.097				0.5514				0.2161
	1st year	75.86	24.14			88.33	11.67			86.41	13.59
	2nd year	81.22	18.78			89.82	10.18			88.28	11.72
	3rd year	80.77	19.23			89.25	10.75			88.76	11.24
	4th year	87.96	12.04			92.4	7.6			92.7	7.3
	Clinical Level			0.0876				0.3899				0.1082
	Preclinical	78.59	21.41			89.05	10.95			87.31	12.69
	Clinical	84.43	15.57			90.76	9.24			90.73	9.27
	School Category			0.0892				0.2267				0.3777
	Public	77.55	22.45			88.37	11.63			87.61	12.39
	Private	83.23	16.77			90.66	9.34			89.43	10.57
	School Region			0.0113				0.008				0.0915
	South	83.33	16.67			81.82	18.18			86.21	13.79
	Midwest	85.78	14.22			88.77	11.23			89.4	10.6
	Northeast	77.23	22.77			93.11	6.89			91.76	8.24
	West	71.9	28.1			89.44	10.56			85.15	14.85
		Conservative vs Other				Liberal vs Other				Moderate vs Other
	Descriptive Statistics	Conservative	Other	χ2 p		Liberal	Other	χ2 p		Moderate	Other	χ2 p
	Medical Prefrences
	Practice in US?			0.0062				0.2138				0.0231
	Yes	81.72	18.28			90	10			89.13	10.87
	No	75	25			80	20			80	20
	Undecided	50	50			82.61	17.39			73.33	26.67
	Employment Type			0.3296				0.3185				0.9633
	Private Practice	85.62	14.38			85.71	14.29			89.22	10.78
	Hospital Employment	78.17	21.83			90.64	9.36			88.34	11.66
	Other	78.57	21.43			91.78	8.22			86.67	13.33
	Undecided	80.25	19.75			89.31	10.69			88.81	11.19
	Private Practice			0.0751				0.0846				0.7499
	Other	78.99	21.01			90.3	9.7			88.42	11.58
	Private Practice	85.62	14.38			85.71	14.29			89.22	10.78
	Specialty			0.0184				0.1189				0.3401
	Primary Care	83.16	16.84			91.96	8.04			889.3	10.7
	Surgery	83.33	16.67			84.47	15.53			89.19	10.81
	Procedural Specialty	82.35	17.65			88.2	11.8			88.65	11.35
	Nonprocedural specialty	81.08	18.92			91.41	8.59			90.07	9.93
	Nonclinical specialty	90	10			91.67	8.33			88.89	11.11
	Other	91.67	8.33			96.3	3.7			96.77	3.23
	Undecided	63.64	36.36			85.88	14.12			83.1	16.9
	Primary Care			0.3069				0.053				0.6407
	Other	79.58	20.42			88.21	11.79			88.26	11.74
	Primary Care	83.16	16.84			91.96	8.04			89.3	10.7
		Conservative vs Other				Liberal vs Other				Moderate vs Other
	Descriptive Statistics	Conservative	Other	χ2 p		Liberal	Other	χ2 p		Moderate	Other	χ2 p
	Outcomes
	Policy Not Doc Scope			0.7887				0.0024				0.0007
	Strongly Disagree	81.07	18.93			92.56	7.44			89.71	10.29
	Moderately Disagree	81.09	18.91			85.39	14.61			88.66	11.34
	Moderately Agree	81.67	18.33			87.06	12.94			88.42	11.58
	Strongly Agree	73.08	26.92			82.5	17.5			56.25	43.75
	Obligation to Care			0.0035				<.0001				<.0001
	Strongly Disagree	72.03	27.97			57.69	42.31			66.67	33.33
	Moderately Disagree	85.53	14.47			81.6	18.4			86.86	13.14
	Moderately Agree	85.35	14.65			92.27	7.73			93.24	6.76
	Strongly Agree	73.91	26.09			94.93	5.07			90.48	9.52
	Favor Cuts			0.0005				<.0001				<.0001
	Strongly Disagree	80.65	19.35			58.14	41.86			75.17	24.83
	Moderately Disagree	85.57	14.43			84.18	15.82			88.89	11.11
	Moderately Agree	80.79	19.21			94.54	5.46			93.32	6.68
	Strongly Agree	55.56	44.44			93.77	6.23			87.1	12.9
	Alternate Favor Cuts			0.0424				<.0001				0.0216
	Strongly Disagree	82.37	17.63			78.85	21.15			85.22	14.78
	Moderately Disagree	83.54	16.46			92.97	7.03			91.77	8.23
	Moderately Agree	71.83	28.17			93.51	6.49			90.65	9.35
	Strongly Agree	65	35			92.93	7.07			82.93	17.07
	Cost Effectiveness Objection			0.2268				<.0001				0.0002
	No Moral Objection	76.51	23.49			90.37	9.63			88.98	11.02
	Moderate Moral Objection	83.27	16.73			91.96	8.04			91.24	8.76
	Strong Moral Objection	81.41	18.59			78.68	21.32			78.2	21.8
	Advocacy Entity			0.4577				0.0003				0.0007
	Professional Organizations	83.57	16.43			91.43	8.57			91.64	8.36
	Student organizations	83.33	16.67			95.56	4.44			90.91	9.09
	Medical Schools	75	25			89.06	10.94			89.06	10.94
	Students	76.92	23.08			92.68	7.32			88.89	11.11
	Myself	77.62	22.38			82.85	17.15			81.05	18.95
				10 variables statistically significant				11 variables statistically significant				12 variables statistically significant
				11 variables insignificant				8 variables insignificant				9 variables insignificant
